# Supplementary figures and images for: Genome-Wide microRNA Profiling Using Oligonucleotide Microarray Reveals Regulatory Networks of microRNAs in Nicotiana benthamiana During Beet Necrotic Yellow Vein Virus Infection
Source: MDPI journal article supplement (doi:10.3390/v12030310), 2020-03-12

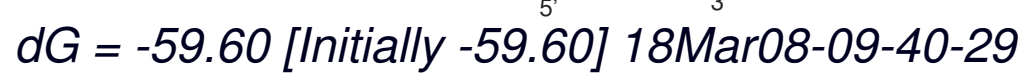

Supplement: s1 [file s1]

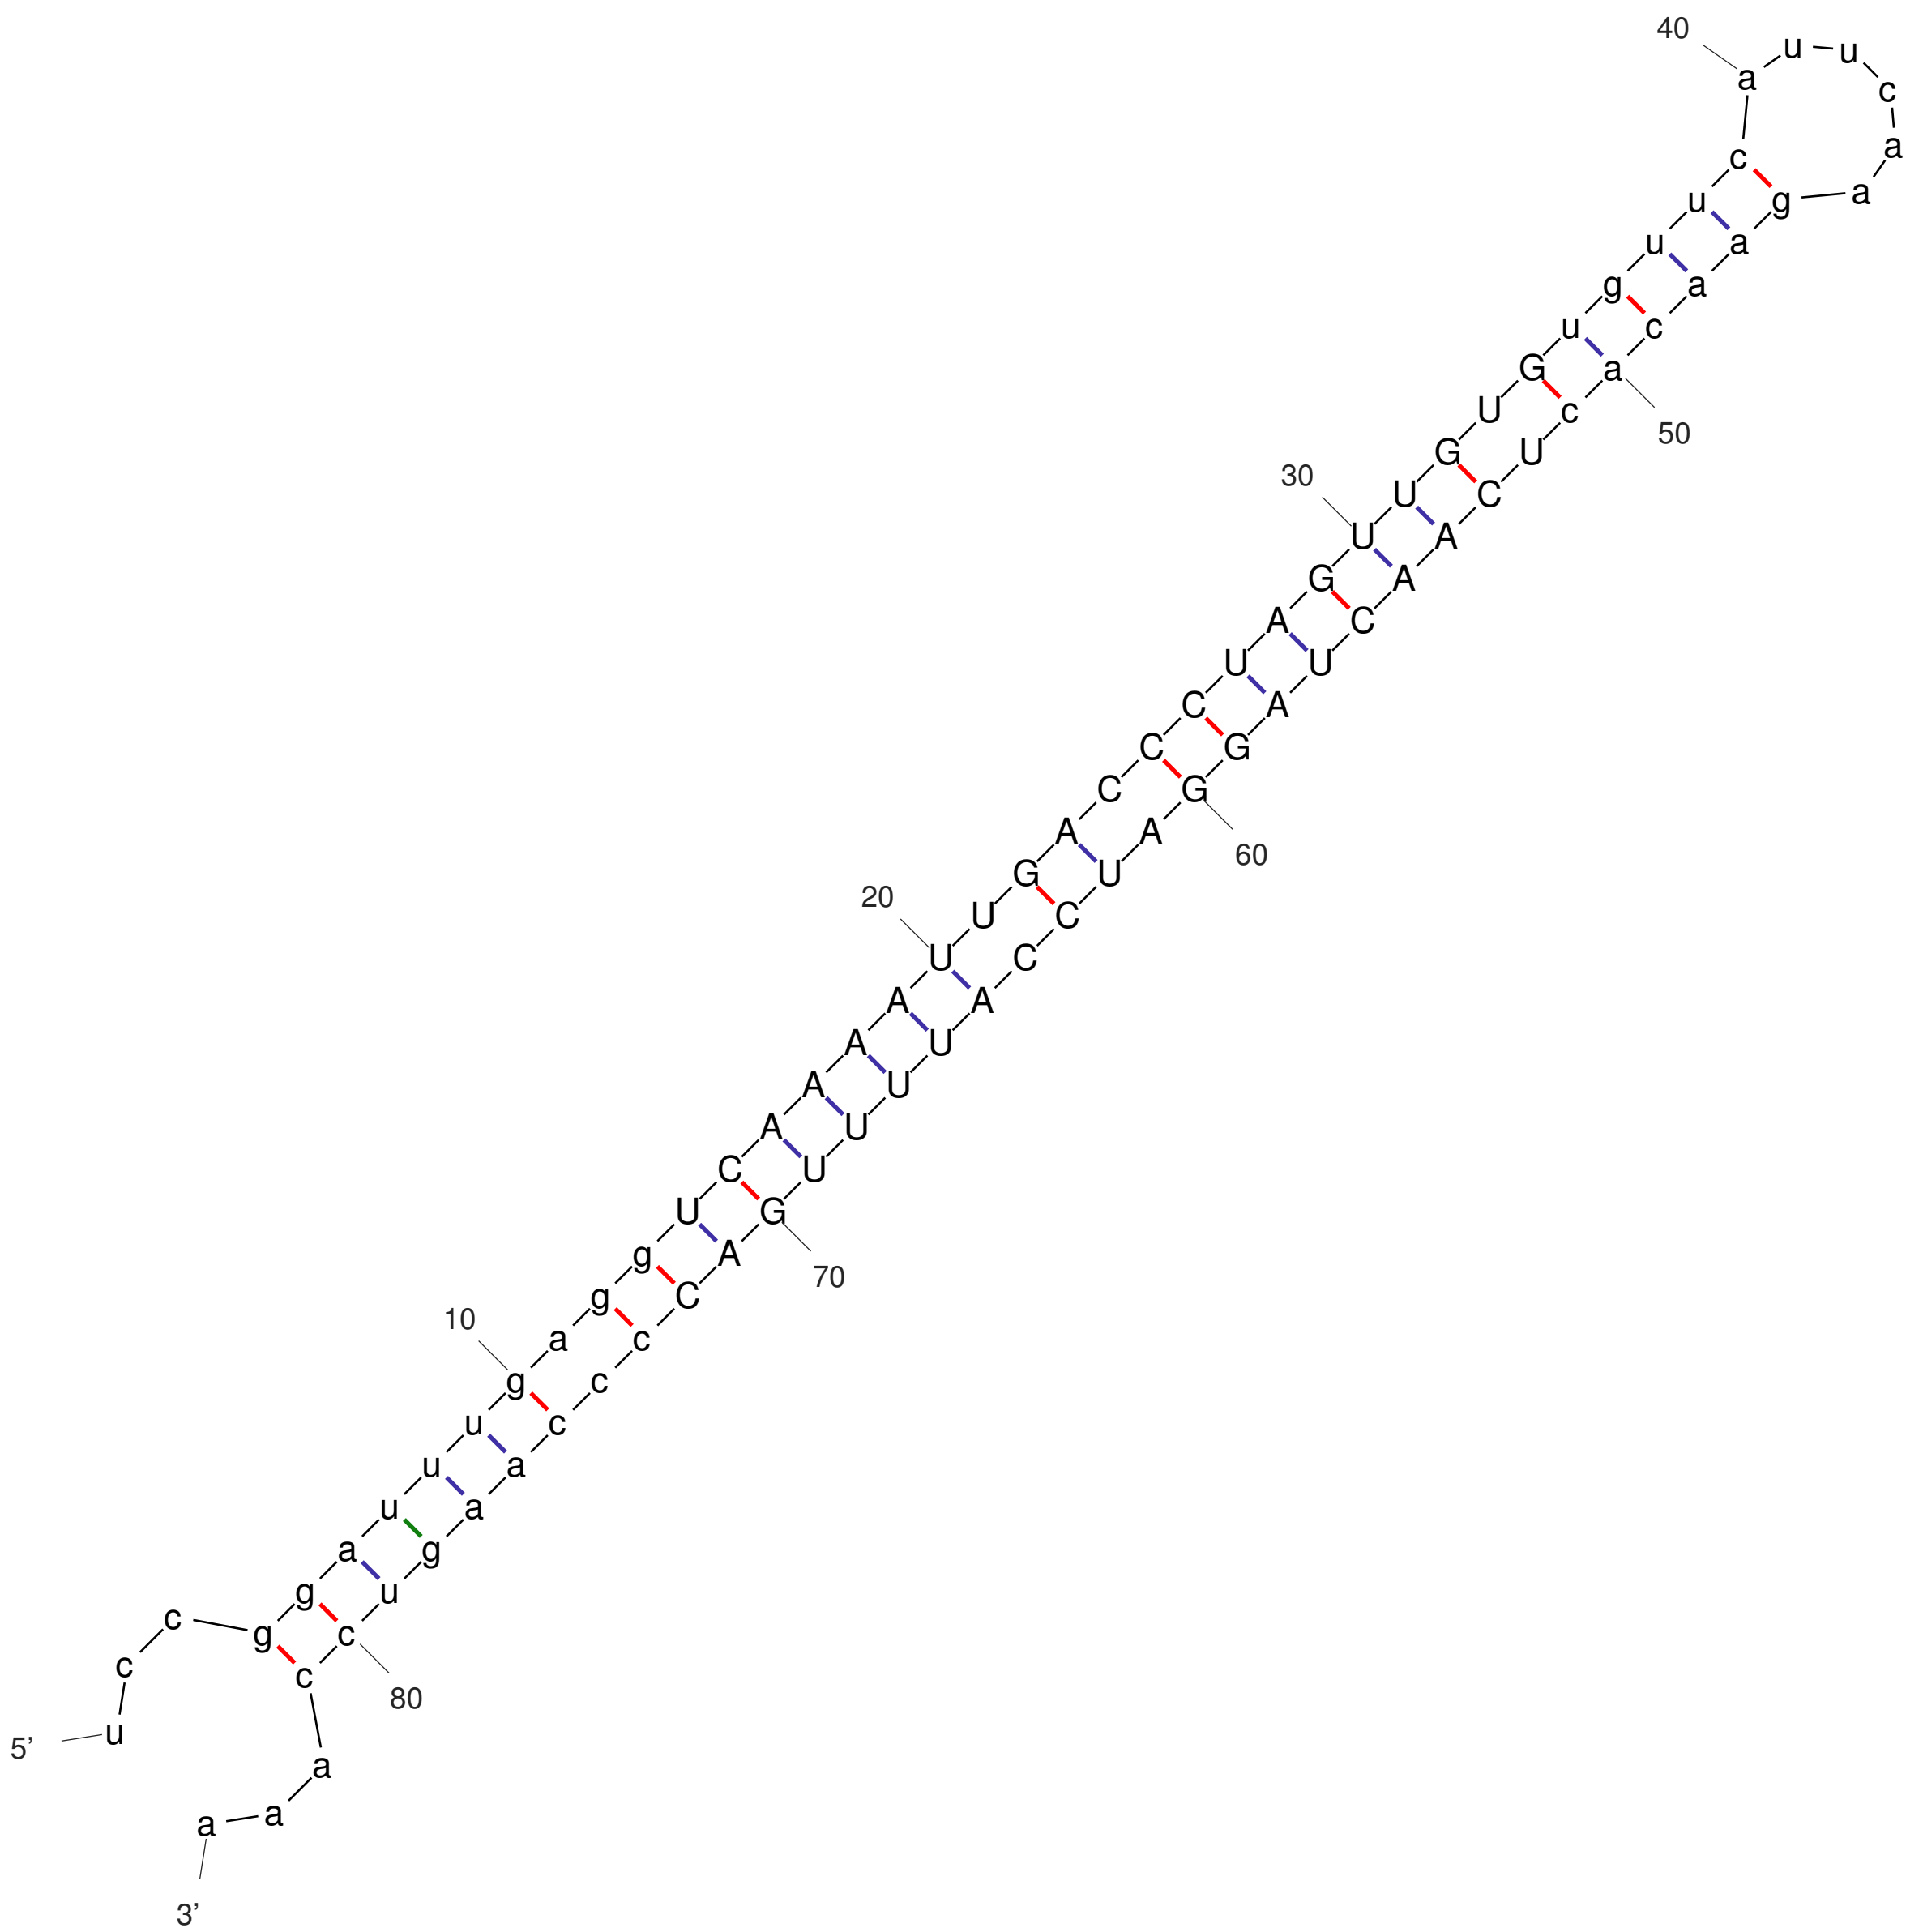

*dG = -46.60 [Initially -46.60] 18Mar08-09-32-39*

Supplement: s1 [file s1]

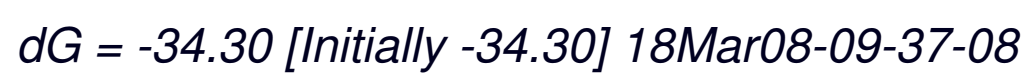

Supplement: s1 [file s1]

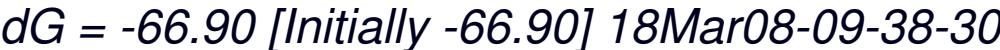

Supplement: s1 [file s1]
